# Supplementary material for: Dysregulated transcriptional networks in KMT2A- and MLLT10-rearranged T-ALL
Source: PubMed Central journal article supplement (PMC6107954; doi:10.1186/s40364-018-0141-z), 2018-08-23
Supplement: 40364_2018_141_MOESM3_ESM.pdf [file 40364_2018_141_MOESM3_ESM.pdf]

Supplementary Table S2. Gene expression profiling for KMT2A-R, MLLT10-R in a molecular interrogation cohort of 100 T-ALL drawn from COG AALL0434 study and the validation cohort of Soulier et al. (2005). Differentially expressed genes in MLL-R T-ALL vs Others ("Others" reflecting cases that do not have either KMT2A-R or MLLT10-R.), MLLT10-R vs Others, MLLT10-R10 vs. KMT2A-R.

| KMT2A-R vs Others |                                          |             |       |          |          |                |       |            |            |           |
|-------------------|------------------------------------------|-------------|-------|----------|----------|----------------|-------|------------|------------|-----------|
| Probe Set ID      | Gene Symbol                              | COG Data    |       |          |          | Soulier's Data |       |            |            | Validated |
|                   |                                          | Fold Change | t     | p-value  | FDR      | Fold Change    | t     | p-value    | FDR        |           |
| 203216_s_at       | MYO6                                     | 12.28       | 12.05 | 3.86E-21 | 1.47E-16 | 19.39          | 76.92 | 4.32E-81   | 5.96E-79   | Yes       |
| 236859_at         | RUNX2                                    | 5.27        | 11.98 | 5.40E-21 | 1.47E-16 |                |       |            |            |           |
| 236858_s_at       | RUNX2                                    | 3.54        | 11.49 | 6.12E-20 | 1.11E-15 |                |       |            |            |           |
| 203215_s_at       | MYO6                                     | 4.40        | 9.78  | 3.16E-16 | 3.94E-12 | 1.91           | 11.43 | 6.06E-19   | 1.04E-17   | Yes       |
| 1557261_at        | WHAMMP2 ///<br>WHAMMP3                   | 3.12        | 9.75  | 3.62E-16 | 3.94E-12 |                |       |            |            |           |
| 235753_at         | HOXA7                                    | 3.37        | 9.61  | 7.53E-16 | 6.84E-12 |                |       |            |            |           |
| 226939_at         | CPEB2                                    | 12.25       | 9.33  | 3.03E-15 | 2.36E-11 |                |       |            |            |           |
| 235479_at         | CPEB2                                    | 3.06        | 9.00  | 1.57E-14 | 1.07E-10 |                |       |            |            |           |
| 235521_at         | HOXA3                                    | 6.13        | 8.81  | 4.11E-14 | 2.49E-10 |                |       |            |            |           |
| 213908_at         | WHAMMP2 ///<br>WHAMMP3                   | 5.71        | 8.79  | 4.58E-14 | 2.49E-10 | 3.51           | 13.30 | 1.38E-22   | 3.82E-21   | Yes       |
| 213844_at         | HOXA5                                    | 11.64       | 8.73  | 6.09E-14 | 3.02E-10 | 6.24           | 4.34  | 3.84E-05   | 0.0001203  | Yes       |
| 1559266_s_at      | SKIDA1                                   | 3.65        | 8.62  | 1.06E-13 | 4.83E-10 |                |       |            |            |           |
| 240927_at         | ---                                      | 3.19        | 8.59  | 1.23E-13 | 5.15E-10 |                |       |            |            |           |
| 240468_at         | ---                                      | 4.25        | 8.53  | 1.66E-13 | 6.44E-10 |                |       |            |            |           |
| 206847_s_at       | HOXA7                                    | 3.40        | 8.41  | 3.05E-13 | 1.11E-09 | 1.36           | 3.33  | 0.0012926  | 0.00302336 | Yes       |
| 209905_at         | HOXA10-HOXA9<br>/// HOXA9 ///<br>MIR196B | 33.09       | 8.36  | 4.04E-13 | 1.38E-09 | 9.30           | 5.00  | 3.00E-06   | 1.22E-05   | Yes       |
| 214651_s_at       | HOXA10-HOXA9<br>/// HOXA9 ///<br>MIR196B | 37.44       | 7.97  | 2.70E-12 | 8.65E-09 | 23.06          | 4.89  | 4.68E-06   | 1.85E-05   | Yes       |
| 210480_s_at       | MYO6                                     | 1.92        | 7.94  | 3.22E-12 | 9.54E-09 | 3.96           | 16.86 | 5.26E-29   | 2.42E-27   | Yes       |
| 228837_at         | TCF4                                     | 1.63        | 7.93  | 3.32E-12 | 9.54E-09 |                |       |            |            |           |
| 206289_at         | HOXA4                                    | 1.91        | 7.90  | 3.91E-12 | 1.07E-08 | 1.44           | 3.74  | 0.00033139 | 0.0008469  | Yes       |
| 206506_s_at       | SUPT3H                                   | 3.06        | 7.88  | 4.27E-12 | 1.11E-08 | 4.44           | 7.35  | 1.08E-10   | 6.77E-10   | Yes       |
| 225627_s_at       | CACHD1                                   | 2.27        | 7.38  | 4.80E-11 | 1.19E-07 |                |       |            |            |           |
| 227195_at         | ZNF503                                   | 5.78        | 7.34  | 6.07E-11 | 1.44E-07 |                |       |            |            |           |
| 215204_at         | ---                                      | 3.35        | 7.26  | 8.68E-11 | 1.97E-07 | 3.78           | 7.36  | 1.03E-10   | 6.74E-10   | Yes       |
| 229290_at         | DAPL1                                    | 2.82        | 7.25  | 9.40E-11 | 2.05E-07 |                |       |            |            |           |
| 244105_at         | WHAMMP2 ///<br>WHAMMP3                   | 1.48        | 7.07  | 2.23E-10 | 4.67E-07 |                |       |            |            |           |
| 203961_at         | NEBL                                     | 2.38        | 6.74  | 1.04E-09 | 2.09E-06 | 6.66           | 10.07 | 3.27E-16   | 4.51E-15   | Yes       |
| 214772_at         | KIAA1549L                                | 1.73        | 6.74  | 1.07E-09 | 2.09E-06 | 1.91           | 11.53 | 3.92E-19   | 7.73E-18   | Yes       |
| 203733_at         | DEXI                                     | 2.17        | 6.69  | 1.35E-09 | 2.54E-06 | 1.34           | 2.17  | 0.03256224 | 0.05479987 | No        |
| 243605_at         | ---                                      | 2.94        | 6.65  | 1.62E-09 | 2.94E-06 |                |       |            |            |           |
| 208557_at         | HOXA6                                    | 2.01        | 6.60  | 2.00E-09 | 3.51E-06 | 1.33           | 2.94  | 0.00422875 | 0.00845751 | Yes       |
| 233792_at         | ---                                      | 3.40        | 6.52  | 2.91E-09 | 4.96E-06 |                |       |            |            |           |
| 1560999_a_at      | ---                                      | 2.92        | 6.51  | 3.04E-09 | 5.01E-06 |                |       |            |            |           |
| 236442_at         | DPF3                                     | 2.98        | 6.49  | 3.33E-09 | 5.33E-06 |                |       |            |            |           |
| 222146_s_at       | TCF4                                     | 4.07        | 6.46  | 3.97E-09 | 6.18E-06 | 9.53           | 9.48  | 5.17E-15   | 5.49E-14   | Yes       |
| 213147_at         | HOXA10                                   | 2.72        | 6.42  | 4.68E-09 | 7.08E-06 | 2.18           | 2.32  | 0.02268423 | 0.03962562 | Yes       |
| 235486_at         | KIAA1549L                                | 2.19        | 6.40  | 5.17E-09 | 7.61E-06 |                |       |            |            |           |
| 1559265_at        | SKIDA1                                   | 1.48        | 6.37  | 5.89E-09 | 8.45E-06 |                |       |            |            |           |
| 213150_at         | HOXA10                                   | 7.65        | 6.36  | 6.19E-09 | 8.66E-06 | 5.07           | 3.51  | 0.00071312 | 0.00169672 | Yes       |
| 214705_at         | INADL                                    | 2.26        | 6.35  | 6.57E-09 | 8.95E-06 | 1.06           | 1.15  | 0.25444382 | 0.31351114 | No        |

|              |                            |       |       |          |          |       |       |            |            |     |
|--------------|----------------------------|-------|-------|----------|----------|-------|-------|------------|------------|-----|
| 221458_at    | HTR1F                      | 1.99  | 6.33  | 7.14E-09 | 9.50E-06 | 2.43  | 9.63  | 2.55E-15   | 2.93E-14   | Yes |
| 239503_at    | C10orf114                  | 1.62  | 6.31  | 7.76E-09 | 9.87E-06 |       |       |            |            |     |
| 229823_at    | RIMS2                      | 3.33  | 6.31  | 7.79E-09 | 9.87E-06 |       |       |            |            |     |
| 1555923_a_at | C10orf114                  | 1.67  | 6.30  | 8.10E-09 | 1.00E-05 |       |       |            |            |     |
| 212382_at    | TCF4                       | 4.24  | 6.29  | 8.52E-09 | 1.03E-05 | 7.10  | 13.67 | 2.76E-23   | 9.52E-22   | Yes |
| 236565_s_at  | LARP6                      | 1.78  | 6.26  | 9.97E-09 | 1.18E-05 |       |       |            |            |     |
| 238532_at    | DPF3                       | 3.70  | 6.23  | 1.13E-08 | 1.31E-05 |       |       |            |            |     |
| 221631_at    | CACNA1I                    | 1.93  | 6.19  | 1.33E-08 | 1.51E-05 | 1.68  | 4.39  | 3.22E-05   | 0.00010578 | Yes |
| 204304_s_at  | PROM1                      | 17.98 | 6.18  | 1.42E-08 | 1.57E-05 | 82.89 | 7.29  | 1.42E-10   | 8.15E-10   | Yes |
| 208015_at    | SMAD1                      | 2.20  | 6.07  | 2.30E-08 | 2.51E-05 | 2.21  | 5.44  | 4.91E-07   | 2.12E-06   | Yes |
| 212387_at    | TCF4                       | 4.15  | 6.01  | 3.01E-08 | 3.22E-05 | 10.52 | 8.69  | 2.07E-13   | 2.04E-12   | Yes |
| 202289_s_at  | TACC2                      | 1.89  | 5.98  | 3.60E-08 | 3.77E-05 | 1.14  | 1.78  | 0.07797512 | 0.11326912 | No  |
| 220588_at    | BCAS4                      | 1.66  | 5.95  | 3.94E-08 | 4.05E-05 | 1.22  | 1.88  | 0.06369916 | 0.09554875 | No  |
| 1553145_at   | TAPT1-AS1                  | 1.85  | 5.95  | 4.04E-08 | 4.07E-05 |       |       |            |            |     |
| 219988_s_at  | RNF220                     | 1.83  | 5.93  | 4.45E-08 | 4.41E-05 | 2.15  | 7.97  | 6.04E-12   | 4.63E-11   | Yes |
| 203753_at    | TCF4                       | 4.48  | 5.89  | 5.21E-08 | 5.08E-05 | 5.33  | 8.46  | 6.09E-13   | 5.61E-12   | Yes |
| 212386_at    | TCF4                       | 3.85  | 5.88  | 5.41E-08 | 5.17E-05 | 19.30 | 8.09  | 3.42E-12   | 2.95E-11   | Yes |
| 206137_at    | RIMS2                      | 1.93  | 5.88  | 5.61E-08 | 5.27E-05 | 1.20  | 2.10  | 0.03855877 | 0.06334656 | No  |
| 243768_at    | ---                        | 2.47  | 5.78  | 8.65E-08 | 7.99E-05 |       |       |            |            |     |
| 223681_s_at  | INADL                      | 2.03  | 5.73  | 1.08E-07 | 9.81E-05 |       |       |            |            |     |
| 213891_s_at  | TCF4                       | 5.26  | 5.72  | 1.15E-07 | 0.000103 | 16.23 | 10.98 | 4.75E-18   | 7.29E-17   | Yes |
| 1553118_at   | THEM4                      | 1.77  | 5.67  | 1.39E-07 | 0.000122 |       |       |            |            |     |
| 208343_s_at  | NR5A2                      | 1.91  | 5.65  | 1.56E-07 | 0.000133 | -1.06 | -0.34 | 0.73801617 | 0.77904883 | No  |
| 211106_at    | SUPT3H                     | 2.62  | 5.65  | 1.56E-07 | 0.000133 | 2.54  | 4.83  | 5.95E-06   | 2.22E-05   | Yes |
| 226297_at    | HIPK3                      | 2.51  | 5.63  | 1.71E-07 | 0.000143 |       |       |            |            |     |
| 205889_s_at  | JAKMIP2                    | 1.51  | 5.59  | 2.04E-07 | 0.000168 | 1.21  | 1.95  | 0.055038   | 0.08590809 | No  |
| 1556739_at   | GOLGA8I                    | 1.54  | 5.58  | 2.06E-07 | 0.000168 |       |       |            |            |     |
| 215163_at    | ---                        | 3.00  | 5.57  | 2.17E-07 | 0.000174 | 1.26  | 2.46  | 0.01589357 | 0.02811938 | Yes |
| 212385_at    | TCF4                       | 2.77  | 5.54  | 2.50E-07 | 0.000198 | 4.16  | 12.97 | 5.99E-22   | 1.38E-20   | Yes |
| 217585_at    | NEBL                       | 1.76  | 5.53  | 2.59E-07 | 0.000202 | 1.77  | 8.04  | 4.43E-12   | 3.60E-11   | Yes |
| 210993_s_at  | SMAD1                      | 4.20  | 5.48  | 3.26E-07 | 0.00025  | 4.31  | 4.35  | 3.67E-05   | 0.00011788 | Yes |
| 232645_at    | LOC153684                  | 1.61  | 5.44  | 3.84E-07 | 0.000291 |       |       |            |            |     |
| 209871_s_at  | APBA2                      | 2.29  | 5.36  | 5.35E-07 | 0.000395 | 1.15  | 0.75  | 0.4581292  | 0.51399861 | No  |
| 217520_x_at  | LOC283683 ///<br>LOC646278 | 4.10  | 5.36  | 5.37E-07 | 0.000395 | 2.64  | 3.85  | 0.00023039 | 0.00061142 | Yes |
| 238798_at    | TAPT1                      | 1.88  | 5.36  | 5.43E-07 | 0.000395 |       |       |            |            |     |
| 206999_at    | IL12RB2                    | 2.18  | 5.34  | 5.79E-07 | 0.000416 | 1.01  | 0.06  | 0.94897939 | 0.9608047  | No  |
| 209199_s_at  | MEF2C                      | 4.74  | 5.34  | 5.91E-07 | 0.000418 | 4.66  | 3.13  | 0.00235248 | 0.00515304 | Yes |
| 1559315_s_at | SOCS2-AS1                  | 2.60  | 5.31  | 6.79E-07 | 0.000474 |       |       |            |            |     |
| 204647_at    | HOMER3                     | 1.66  | 5.30  | 6.93E-07 | 0.000478 | 1.54  | 3.57  | 0.00058163 | 0.0014333  | Yes |
| 1555270_a_at | WFS1                       | 1.37  | 5.30  | 7.02E-07 | 0.000479 |       |       |            |            |     |
| 221349_at    | VPREB1                     | 4.83  | 5.29  | 7.19E-07 | 0.000484 | 5.95  | 3.67  | 0.00041577 | 0.0010432  | Yes |
| 1559477_s_at | MEIS1                      | 3.58  | 5.29  | 7.38E-07 | 0.000491 |       |       |            |            |     |
| 232231_at    | RUNX2                      | 11.93 | 5.28  | 7.47E-07 | 0.000491 |       |       |            |            |     |
| 204069_at    | MEIS1                      | 4.11  | 5.27  | 8.08E-07 | 0.000524 | 4.45  | 6.21  | 1.78E-08   | 8.18E-08   | Yes |
| 37802_r_at   | FAM63B                     | 1.41  | 5.25  | 8.59E-07 | 0.000551 | 1.39  | 6.45  | 6.18E-09   | 3.05E-08   | Yes |
| 221654_s_at  | USP3                       | -2.98 | -5.24 | 8.94E-07 | 0.000567 | -1.65 | -1.66 | 0.10092683 | 0.14212145 | No  |
| 214790_at    | SENPA6                     | 4.49  | 5.18  | 1.15E-06 | 0.00072  | 15.79 | 17.68 | 2.20E-30   | 1.52E-28   | Yes |
| 205327_s_at  | ACVR2A                     | 1.44  | 5.17  | 1.22E-06 | 0.000755 | 1.14  | 1.47  | 0.14397287 | 0.18743637 | No  |
| 204361_s_at  | SKAP2                      | 3.07  | 5.16  | 1.24E-06 | 0.00076  | 2.25  | 3.98  | 0.00014335 | 0.00040552 | Yes |
| 218597_s_at  | CISD1                      | -2.43 | -5.13 | 1.42E-06 | 0.000859 | -2.55 | -3.26 | 0.00160989 | 0.00370275 | Yes |
| 239963_at    | ---                        | 2.87  | 5.11  | 1.56E-06 | 0.000936 |       |       |            |            |     |
| 228416_at    | ACVR2A                     | 1.58  | 5.11  | 1.59E-06 | 0.000942 |       |       |            |            |     |
| 203962_s_at  | NEBL                       | 1.82  | 5.10  | 1.62E-06 | 0.000942 | 6.29  | 10.02 | 4.19E-16   | 5.26E-15   | Yes |
| 227877_at    | ANXA2R                     | 2.43  | 5.10  | 1.62E-06 | 0.000942 |       |       |            |            |     |
| 202967_at    | GSTA4                      | 1.98  | 5.10  | 1.65E-06 | 0.000946 | 1.71  | 3.98  | 0.00014399 | 0.00040552 | Yes |
| 237680_at    | ---                        | 1.68  | 5.09  | 1.70E-06 | 0.000963 |       |       |            |            |     |
| 227592_at    | ALDH16A1                   | 1.41  | 5.09  | 1.72E-06 | 0.000968 |       |       |            |            |     |

|             |           |       |       |          |          |       |       |            |            |     |
|-------------|-----------|-------|-------|----------|----------|-------|-------|------------|------------|-----|
| 203349_s_at | ETV5      | 3.59  | 5.07  | 1.84E-06 | 0.001025 | 11.12 | 5.91  | 6.71E-08   | 2.99E-07   | Yes |
| 205448_s_at | MAP3K12   | 1.33  | 5.06  | 1.92E-06 | 0.001059 | 1.21  | 1.98  | 0.0508573  | 0.0806702  | No  |
| 242598_at   | ---       | 3.04  | 5.02  | 2.29E-06 | 0.001249 |       |       |            |            |     |
| 225752_at   | NIPA1     | 2.68  | 5.01  | 2.34E-06 | 0.001263 |       |       |            |            |     |
| 210174_at   | NR5A2     | 1.95  | 5.00  | 2.45E-06 | 0.001308 | -1.05 | -0.35 | 0.72471679 | 0.77527842 | No  |
| 228855_at   | NUDT7     | 1.85  | 4.98  | 2.64E-06 | 0.001399 |       |       |            |            |     |
| 234994_at   | TMEM200A  | 2.15  | 4.98  | 2.70E-06 | 0.001415 |       |       |            |            |     |
| 212265_at   | QKI       | -2.92 | -4.97 | 2.79E-06 | 0.001447 | -6.96 | -3.80 | 0.00027296 | 0.00071071 | Yes |
| 235291_s_at | FLJ32255  | 2.10  | 4.95  | 3.03E-06 | 0.001556 |       |       |            |            |     |
| 206335_at   | GALNS     | 1.51  | 4.91  | 3.65E-06 | 0.001857 | -1.28 | -2.30 | 0.02372081 | 0.04091839 | No  |
| 211685_s_at | NCALD     | 1.48  | 4.90  | 3.69E-06 | 0.001863 | 1.43  | 2.07  | 0.04098435 | 0.06576558 | No  |
| 242414_at   | QPRT      | 1.79  | 4.89  | 3.94E-06 | 0.001953 |       |       |            |            |     |
| 209870_s_at | APBA2     | 1.65  | 4.89  | 3.94E-06 | 0.001953 | 1.18  | 0.91  | 0.36723531 | 0.42232061 | No  |
| 226140_s_at | OTUD1     | 3.05  | 4.87  | 4.15E-06 | 0.00204  |       |       |            |            |     |
| 205402_x_at | PRSS2     | 3.68  | 4.86  | 4.39E-06 | 0.002138 | 4.81  | 7.04  | 4.49E-10   | 2.39E-09   | Yes |
| 203836_s_at | MAP3K5    | 2.05  | 4.85  | 4.63E-06 | 0.002232 | -1.20 | -1.24 | 0.21879313 | 0.27448593 | No  |
| 205349_at   | GNA15     | -2.90 | -4.82 | 5.19E-06 | 0.002482 | -1.06 | -0.22 | 0.82327826 | 0.85422857 | No  |
| 242461_at   | ---       | 1.37  | 4.81  | 5.46E-06 | 0.002588 |       |       |            |            |     |
| 235173_at   | MBNL1-AS1 | 1.34  | 4.79  | 5.81E-06 | 0.002719 |       |       |            |            |     |
| 46665_at    | SEMA4C    | 1.66  | 4.79  | 5.84E-06 | 0.002719 | 1.26  | 1.81  | 0.07439059 | 0.11038603 | No  |
| 221696_s_at | STYK1     | 1.26  | 4.78  | 6.08E-06 | 0.002807 | 1.08  | 1.41  | 0.16215605 | 0.20913585 | No  |
| 218409_s_at | DNAJC1    | 2.23  | 4.77  | 6.29E-06 | 0.002881 | 3.58  | 6.26  | 1.48E-08   | 7.04E-08   | Yes |
| 216048_s_at | RHOBTB3   | 1.69  | 4.74  | 7.11E-06 | 0.003229 | -1.22 | -1.11 | 0.27052346 | 0.32462815 | No  |
| 214691_x_at | FAM63B    | 1.60  | 4.74  | 7.22E-06 | 0.003253 | 2.63  | 7.29  | 1.41E-10   | 8.15E-10   | Yes |
| 215164_at   | ---       | 1.91  | 4.73  | 7.42E-06 | 0.003317 | 1.68  | 7.60  | 3.34E-11   | 2.30E-10   | Yes |
| 205518_s_at | CMAHP     | -4.24 | -4.72 | 7.71E-06 | 0.003416 | -3.01 | -2.70 | 0.00837843 | 0.01583868 | Yes |
| 240570_at   | INADL     | 1.33  | 4.70  | 8.33E-06 | 0.003661 |       |       |            |            |     |
| 210033_s_at | SPAG6     | 2.50  | 4.69  | 8.74E-06 | 0.003794 | 4.29  | 4.69  | 1.02E-05   | 3.70E-05   | Yes |
| 213428_s_at | COL6A1    | 2.03  | 4.69  | 8.77E-06 | 0.003794 | 1.54  | 2.97  | 0.00390719 | 0.00804764 | Yes |
| 200984_s_at | CD59      | 2.24  | 4.67  | 9.39E-06 | 0.004003 | 3.19  | 4.45  | 2.60E-05   | 8.76E-05   | Yes |
| 236395_at   | ---       | 4.44  | 4.67  | 9.40E-06 | 0.004003 |       |       |            |            |     |
| 244230_at   | ---       | 1.35  | 4.67  | 9.57E-06 | 0.004045 |       |       |            |            |     |
| 239578_at   | ---       | 1.57  | 4.66  | 9.75E-06 | 0.004088 |       |       |            |            |     |
| 212263_at   | QKI       | -4.40 | -4.66 | 1.00E-05 | 0.004165 | -2.58 | -3.07 | 0.00288135 | 0.0062129  | Yes |
| 225710_at   | GNB4      | -3.97 | -4.62 | 1.17E-05 | 0.004817 |       |       |            |            |     |
| 204981_at   | SLC22A18  | 1.40  | 4.60  | 1.25E-05 | 0.00512  | 1.31  | 1.90  | 0.06132887 | 0.09300423 | No  |
| 229393_at   | L3MBTL3   | 2.62  | 4.59  | 1.32E-05 | 0.005376 |       |       |            |            |     |
| 226764_at   | ZNF827    | 2.53  | 4.56  | 1.46E-05 | 0.005889 |       |       |            |            |     |
| 206746_at   | BFSP1     | 1.17  | 4.56  | 1.48E-05 | 0.005935 | 1.22  | 3.04  | 0.00312024 | 0.00662451 | Yes |
| 228221_at   | SLC44A3   | 1.82  | 4.55  | 1.51E-05 | 0.005993 |       |       |            |            |     |
| 209647_s_at | SOCS5     | -1.67 | -4.53 | 1.66E-05 | 0.006561 | -1.23 | -1.03 | 0.30420205 | 0.35576173 | No  |
| 225639_at   | SKAP2     | 4.31  | 4.51  | 1.76E-05 | 0.00683  |       |       |            |            |     |
| 233280_at   | ---       | 1.53  | 4.51  | 1.77E-05 | 0.00683  |       |       |            |            |     |
| 243618_s_at | ZNF827    | 2.40  | 4.51  | 1.78E-05 | 0.00683  |       |       |            |            |     |
| 234107_s_at | DTD1      | 2.44  | 4.51  | 1.78E-05 | 0.00683  |       |       |            |            |     |
| 213169_at   | SEMA5A    | 1.44  | 4.49  | 1.91E-05 | 0.007238 | 1.07  | 0.69  | 0.49445545 | 0.55028107 | No  |
| 223836_at   | FGFBP2    | 2.47  | 4.49  | 1.91E-05 | 0.007238 |       |       |            |            |     |
| 213693_s_at | MUC1      | 1.37  | 4.48  | 1.98E-05 | 0.007457 | 1.24  | 1.62  | 0.10796306 | 0.14898903 | No  |
| 204675_at   | SRD5A1    | 2.02  | 4.46  | 2.19E-05 | 0.008126 | 1.15  | 0.89  | 0.37465328 | 0.42729051 | No  |
| 210032_s_at | SPAG6     | 1.61  | 4.46  | 2.19E-05 | 0.008126 | 1.51  | 2.95  | 0.00414736 | 0.00841669 | Yes |
| 240180_at   | ---       | 1.81  | 4.45  | 2.24E-05 | 0.008246 |       |       |            |            |     |
| 242172_at   | ---       | 2.53  | 4.44  | 2.29E-05 | 0.008378 |       |       |            |            |     |
| 209200_at   | MEF2C     | 2.71  | 4.43  | 2.39E-05 | 0.008674 | 6.84  | 3.97  | 0.00014868 | 0.00041035 | Yes |
| 218380_at   | LOC728392 | 2.38  | 4.43  | 2.41E-05 | 0.00868  | 2.47  | 4.25  | 5.36E-05   | 0.00016429 | Yes |
| 243617_at   | ZNF827    | 2.11  | 4.43  | 2.42E-05 | 0.00868  |       |       |            |            |     |
| 210542_s_at | SLCO3A1   | 1.39  | 4.43  | 2.47E-05 | 0.008766 | 1.20  | 2.23  | 0.02819639 | 0.04803829 | Yes |
| 229253_at   | THEM4     | 1.91  | 4.42  | 2.48E-05 | 0.008766 |       |       |            |            |     |
| 243492_at   | THEM4     | 1.39  | 4.41  | 2.62E-05 | 0.00921  |       |       |            |            |     |
| 232629_at   | PROK2     | 2.36  | 4.41  | 2.64E-05 | 0.009211 |       |       |            |            |     |
| 213644_at   | CEP112    | 1.40  | 4.39  | 2.86E-05 | 0.009849 | 1.21  | 2.54  | 0.01274835 | 0.02314832 | Yes |
| 222111_at   | FAM63B    | 2.63  | 4.39  | 2.87E-05 | 0.009849 | 3.98  | 7.18  | 2.33E-10   | 1.28E-09   | Yes |
| 214752_x_at | FLNA      | 1.59  | 4.39  | 2.88E-05 | 0.009849 | 1.42  | 1.57  | 0.11893431 | 0.15934889 | No  |
| 1560018_at  | ARPP21    | 1.77  | 4.38  | 2.89E-05 | 0.009849 |       |       |            |            |     |

|              |                                     |       |       |           |          |       |       |            |            |     |
|--------------|-------------------------------------|-------|-------|-----------|----------|-------|-------|------------|------------|-----|
| 215307_at    | ZNF529                              | -2.52 | -4.38 | 2.96E-05  | 0.01002  | -1.95 | -2.63 | 0.01017707 | 0.01897885 | Yes |
| 219225_at    | PGBD5                               | 1.46  | 4.37  | 3.01E-05  | 0.010128 | 1.21  | 1.72  | 0.08920732 | 0.12823552 | No  |
| 211056_s_at  | SRD5A1                              | 1.42  | 4.37  | 3.04E-05  | 0.010161 | 1.20  | 1.94  | 0.05603917 | 0.08592673 | No  |
| 206361_at    | PTGDR2                              | 1.39  | 4.35  | 3.28E-05  | 0.010892 | 2.29  | 3.94  | 0.00016703 | 0.00045196 | Yes |
| 241936_x_at  | ---                                 | 1.44  | 4.35  | 3.36E-05  | 0.011097 |       |       |            |            |     |
| 235957_at    | GRIP1                               | 1.74  | 4.32  | 3.76E-05  | 0.012276 |       |       |            |            |     |
| 230102_at    | ETV5                                | 2.00  | 4.31  | 3.78E-05  | 0.012276 |       |       |            |            |     |
| 200983_x_at  | CD59                                | 2.00  | 4.31  | 3.78E-05  | 0.012276 | 2.59  | 2.98  | 0.00378056 | 0.00790481 | Yes |
| 211555_s_at  | GUCY1B3                             | 1.60  | 4.31  | 3.85E-05  | 0.012423 | 5.38  | 4.67  | 1.09E-05   | 3.85E-05   | Yes |
| 1556842_at   | LOC286087                           | 2.12  | 4.30  | 4.04E-05  | 0.012898 |       |       |            |            |     |
| 229636_at    | ---                                 | 1.26  | 4.30  | 4.05E-05  | 0.012898 |       |       |            |            |     |
| 205578_at    | ROR2                                | 1.25  | 4.29  | 4.12E-05  | 0.013063 | -1.03 | -0.62 | 0.53824844 | 0.59422628 | No  |
| 227399_at    | VGLL3                               | 1.92  | 4.28  | 4.30E-05  | 0.013557 |       |       |            |            |     |
| 207463_x_at  | PRSS2 /// PRSS3                     | 2.08  | 4.26  | 4.64E-05  | 0.014549 | 2.78  | 4.54  | 1.82E-05   | 6.29E-05   | Yes |
| 219746_at    | DPF3                                | 1.54  | 4.26  | 4.68E-05  | 0.014582 | 1.92  | 7.72  | 1.95E-11   | 1.41E-10   | Yes |
| 202970_at    | DYRK2                               | 1.64  | 4.26  | 4.74E-05  | 0.014667 | 1.06  | 0.80  | 0.42479538 | 0.48050625 | No  |
| 202255_s_at  | SIPA1L1                             | 1.46  | 4.25  | 4.81E-05  | 0.014807 | 1.01  | 0.07  | 0.9426252  | 0.9608047  | No  |
| 204362_at    | SKAP2                               | 3.26  | 4.24  | 5.00E-05  | 0.015302 | 3.03  | 3.24  | 0.00170119 | 0.00384859 | Yes |
| 216470_x_at  | PRSS2                               | 2.34  | 4.22  | 5.42E-05  | 0.016506 | 3.26  | 6.82  | 1.21E-09   | 6.18E-09   | Yes |
| 241782_at    | NEBL                                | 1.30  | 4.21  | 5.55E-05  | 0.01677  |       |       |            |            |     |
| 220102_at    | FOXL2                               | 1.84  | 4.21  | 5.57E-05  | 0.01677  | -1.11 | -1.52 | 0.13163138 | 0.17300124 | No  |
| 227798_at    | SMAD1                               | 3.92  | 4.21  | 5.61E-05  | 0.016804 |       |       |            |            |     |
| 236901_at    | ---                                 | 1.28  | 4.19  | 5.98E-05  | 0.017806 |       |       |            |            |     |
| 1560662_s_at | WHAMMP2 /// WHAMMP3                 | 2.10  | 4.19  | 6.11E-05  | 0.018091 |       |       |            |            |     |
| 232051_at    | CCDC102A                            | 1.27  | 4.19  | 6.14E-05  | 0.018091 |       |       |            |            |     |
| 209581_at    | PLA2G16                             | 1.52  | 4.18  | 6.17E-05  | 0.018091 | 1.16  | 1.12  | 0.26540928 | 0.32128492 | No  |
| 203348_s_at  | ETV5                                | 1.75  | 4.18  | 6.31E-05  | 0.018404 | 3.14  | 4.87  | 5.00E-06   | 1.91E-05   | Yes |
| 225280_x_at  | ARSD                                | 1.35  | 4.17  | 6.50E-05  | 0.018831 |       |       |            |            |     |
| 204044_at    | QPRT                                | 1.67  | 4.16  | 6.66E-05  | 0.019138 | 1.45  | 2.16  | 0.0332658  | 0.0553094  | No  |
| 210959_s_at  | SRD5A1                              | 1.41  | 4.16  | 6.70E-05  | 0.019138 | -1.11 | -1.05 | 0.29548575 | 0.34852165 | No  |
| 211382_s_at  | TACC2                               | 1.44  | 4.16  | 6.71E-05  | 0.019138 | 1.19  | 1.79  | 0.07653169 | 0.11235504 | No  |
| 226981_at    | KMT2A                               | -1.97 | -4.16 | 6.82E-05  | 0.019368 |       |       |            |            |     |
| 213737_x_at  | GOLGA8I /// GOLGA8O                 | 3.26  | 4.15  | 6.93E-05  | 0.019569 | 5.41  | 2.87  | 0.00521624 | 0.01028344 | Yes |
| 228748_at    | CD59                                | 1.39  | 4.15  | 7.04E-05  | 0.019771 |       |       |            |            |     |
| 208127_s_at  | SOCS5                               | -2.33 | -4.14 | 7.37E-05  | 0.020602 | -1.32 | -1.28 | 0.20297666 | 0.25697962 | No  |
| 232597_x_at  | SCAF11                              | 1.56  | 4.13  | 7.54E-05  | 0.020978 |       |       |            |            |     |
| 234423_x_at  | LOC100996255                        | 1.50  | 4.12  | 7.79E-05  | 0.02154  |       |       |            |            |     |
| 1560758_at   | ---                                 | 1.31  | 4.12  | 7.97E-05  | 0.021948 |       |       |            |            |     |
| 238498_at    | OTTHUMG0000 0175943 /// RP3-406A7.7 | 1.57  | 4.11  | 8.12E-05  | 0.022245 |       |       |            |            |     |
| 209648_x_at  | SOCS5                               | -2.49 | -4.11 | 8.19E-05  | 0.022314 | -1.24 | -1.13 | 0.26286341 | 0.32101903 | No  |
| 239296_at    | ---                                 | 1.60  | 4.11  | 8.30E-05  | 0.022498 |       |       |            |            |     |
| 231902_at    | ZNF827                              | 1.57  | 4.10  | 8.41E-05  | 0.022699 |       |       |            |            |     |
| 205229_s_at  | COCH                                | 1.74  | 4.10  | 8.51E-05  | 0.022852 | 1.90  | 3.20  | 0.00189727 | 0.00422297 | Yes |
| 201997_s_at  | SPEN                                | -1.95 | -4.09 | 8.66E-05  | 0.023133 | -1.27 | -1.58 | 0.11823278 | 0.15934889 | No  |
| 200985_s_at  | CD59                                | 2.88  | 4.08  | 8.95E-05  | 0.023788 | 5.43  | 4.02  | 0.00012656 | 0.0003716  | Yes |
| 1560512_at   | ---                                 | 1.45  | 4.08  | 9.08E-05  | 0.024026 |       |       |            |            |     |
| 226971_at    | CCDC136                             | 1.35  | 4.07  | 9.47E-05  | 0.024927 |       |       |            |            |     |
| 220488_s_at  | BCAS3                               | 1.37  | 4.07  | 9.58E-05  | 0.025092 | 1.10  | 0.97  | 0.33494499 | 0.3884236  | No  |
| 232298_at    | MBNL1-AS1                           | 1.17  | 4.04  | 0.0001036 | 0.027022 |       |       |            |            |     |
| 226873_at    | FAM63B                              | 2.88  | 4.04  | 0.0001055 | 0.027395 |       |       |            |            |     |
| 227769_at    | GPR27                               | 2.29  | 4.03  | 0.0001081 | 0.027914 |       |       |            |            |     |
| 216373_at    | TAPT1                               | 2.65  | 4.03  | 0.0001108 | 0.028483 | 1.13  | 2.83  | 0.00574261 | 0.01116169 | Yes |

|              |                                                  |       |       |           |          |       |       |            |            |     |  |
|--------------|--------------------------------------------------|-------|-------|-----------|----------|-------|-------|------------|------------|-----|--|
| 235758_at    | PNMA6A ///<br>PNMA6B ///<br>PNMA6C ///<br>PNMA6D | 1.47  | 4.03  | 0.0001113 | 0.028483 |       |       |            |            |     |  |
| 202975_s_at  | RHOBTB3                                          | 2.24  | 4.02  | 0.0001121 | 0.02854  | -1.12 | -0.53 | 0.59435625 | 0.65096161 | No  |  |
| 1568589_at   | ---                                              | 1.51  | 4.02  | 0.0001149 | 0.029117 |       |       |            |            |     |  |
| 1555963_x_at | B3GNT7                                           | 1.31  | 4.01  | 0.0001176 | 0.029684 |       |       |            |            |     |  |
| 205572_at    | ANGPT2                                           | 1.55  | 4.00  | 0.0001219 | 0.03063  | -1.01 | -0.06 | 0.95384235 | 0.9608047  | No  |  |
| 229461_x_at  | NEGR1                                            | 3.32  | 3.99  | 0.0001242 | 0.031058 |       |       |            |            |     |  |
| 236008_at    | LOC100128909                                     | 1.35  | 3.98  | 0.0001327 | 0.033016 |       |       |            |            |     |  |
| 239842_x_at  | ---                                              | 1.36  | 3.97  | 0.0001355 | 0.033559 |       |       |            |            |     |  |
| 205471_s_at  | DACH1                                            | 2.08  | 3.97  | 0.0001368 | 0.033735 | 1.33  | 1.94  | 0.05540449 | 0.08590809 | No  |  |
| 202908_at    | WFS1                                             | 1.38  | 3.97  | 0.0001384 | 0.033918 | 2.18  | 5.03  | 2.67E-06   | 1.12E-05   | Yes |  |
| 1554703_at   | ARHGEF10                                         | 1.56  | 3.96  | 0.0001388 | 0.033918 |       |       |            |            |     |  |
| 242055_at    | PSMG4                                            | 1.93  | 3.96  | 0.0001402 | 0.033924 |       |       |            |            |     |  |
| 214930_at    | SLITRK5                                          | 1.50  | 3.96  | 0.0001403 | 0.033924 | 1.13  | 1.71  | 0.09114866 | 0.12967542 | No  |  |
| 238850_at    | LINC00461 ///<br>MIR9-2                          | 2.29  | 3.96  | 0.000141  | 0.033924 |       |       |            |            |     |  |
| 215802_at    | ---                                              | 1.58  | 3.96  | 0.0001413 | 0.033924 | 1.03  | 0.33  | 0.73953186 | 0.77904883 | No  |  |
| 243049_at    | ---                                              | 1.45  | 3.95  | 0.0001437 | 0.034324 |       |       |            |            |     |  |
| 202254_at    | SIPA1L1                                          | 1.73  | 3.95  | 0.0001442 | 0.034324 | 1.08  | 0.31  | 0.75742054 | 0.79184874 | No  |  |
| 214535_s_at  | ADAMTS2                                          | 1.26  | 3.92  | 0.0001606 | 0.037956 | 1.40  | 3.53  | 0.00066598 | 0.00161236 | Yes |  |
| 214639_s_at  | HOXA1                                            | 1.35  | 3.92  | 0.0001612 | 0.037956 | -1.00 | -0.02 | 0.98521935 | 0.98521935 | No  |  |
| 228412_at    | LOC643072                                        | 1.33  | 3.92  | 0.0001619 | 0.037956 |       |       |            |            |     |  |
| 209572_s_at  | EED                                              | -2.02 | -3.92 | 0.0001623 | 0.037956 | -1.12 | -0.50 | 0.61951817 | 0.67317723 | No  |  |
| 240321_at    | ---                                              | 1.52  | 3.92  | 0.0001646 | 0.038303 |       |       |            |            |     |  |
| 218831_s_at  | FCGRT                                            | 1.55  | 3.92  | 0.0001651 | 0.038303 | 1.82  | 2.50  | 0.01425176 | 0.02554212 | Yes |  |
| 203870_at    | USP46                                            | 1.70  | 3.91  | 0.0001662 | 0.038395 | 1.34  | 1.58  | 0.11861987 | 0.15934889 | No  |  |
| 210304_at    | PDE6B                                            | 1.29  | 3.90  | 0.000174  | 0.040008 | 1.09  | 1.22  | 0.22580132 | 0.28072596 | No  |  |
| 221610_s_at  | STAP2                                            | -1.28 | -3.89 | 0.0001792 | 0.041047 | -1.20 | -1.62 | 0.1078463  | 0.14898903 | No  |  |
| 213421_x_at  | PRSS2 /// PRSS3                                  | 2.00  | 3.89  | 0.0001819 | 0.041443 | 2.29  | 4.06  | 0.0001074  | 0.0003222  | Yes |  |
| 219860_at    | LY6G5C                                           | 1.25  | 3.89  | 0.0001825 | 0.041443 | 1.17  | 1.36  | 0.17609268 | 0.22500731 | No  |  |
| 225949_at    | NRBP2                                            | 1.75  | 3.88  | 0.0001864 | 0.042165 |       |       |            |            |     |  |
| 215197_at    | ---                                              | 1.31  | 3.88  | 0.0001876 | 0.04225  | 1.04  | 0.46  | 0.64404887 | 0.69436519 | No  |  |
| 237058_x_at  | SLC6A13                                          | 1.93  | 3.88  | 0.0001898 | 0.04256  |       |       |            |            |     |  |
| 225286_at    | ARSD                                             | 1.39  | 3.88  | 0.0001908 | 0.042614 |       |       |            |            |     |  |
| 244480_at    | ---                                              | 1.33  | 3.87  | 0.0001938 | 0.043123 |       |       |            |            |     |  |
| 226415_at    | VAT1L                                            | 1.47  | 3.87  | 0.0001961 | 0.043457 |       |       |            |            |     |  |
| 220030_at    | STYK1                                            | 1.28  | 3.86  | 0.0001998 | 0.044085 | 1.10  | 1.53  | 0.12968271 | 0.17207898 | No  |  |
| 226311_at    | ADAMTS2                                          | 1.38  | 3.86  | 0.000201  | 0.044174 |       |       |            |            |     |  |
| 231035_s_at  | OTUD1                                            | 1.54  | 3.86  | 0.0002046 | 0.044785 |       |       |            |            |     |  |
| 1555842_at   | CYTH2                                            | 1.53  | 3.85  | 0.0002118 | 0.046085 |       |       |            |            |     |  |
| 236632_at    | HHIP-AS1                                         | 2.20  | 3.84  | 0.0002138 | 0.046085 |       |       |            |            |     |  |
| 211707_s_at  | IQCB1                                            | -1.55 | -3.84 | 0.0002138 | 0.046085 | -1.34 | -2.09 | 0.03982135 | 0.06465114 | No  |  |
| 204671_s_at  | ANKRD6                                           | 1.61  | 3.84  | 0.0002139 | 0.046085 | 1.18  | 1.07  | 0.28724692 | 0.34172478 | No  |  |
| 1562194_at   | ---                                              | 1.81  | 3.84  | 0.0002157 | 0.046295 |       |       |            |            |     |  |
| 1566903_at   | ---                                              | 1.31  | 3.84  | 0.0002169 | 0.046357 |       |       |            |            |     |  |
| 205488_at    | GZMA                                             | 3.78  | 3.84  | 0.0002202 | 0.046892 | -1.06 | -0.15 | 0.88409618 | 0.91048712 | No  |  |
| 205826_at    | MYOM2                                            | 2.84  | 3.82  | 0.0002298 | 0.048729 | 2.91  | 2.82  | 0.00598536 | 0.01147194 | Yes |  |
| 218376_s_at  | MICAL1                                           | 2.13  | 3.82  | 0.0002363 | 0.049926 | 1.95  | 2.60  | 0.01092152 | 0.02009559 | Yes |  |

**MLLT10-R vs Others**

| Probe Set ID | Gene Symbol | COG Data |      |          |          | Soulier's Data |      |           |            | Validated |
|--------------|-------------|----------|------|----------|----------|----------------|------|-----------|------------|-----------|
|              |             | old Chag | t    | p-value  | FDR      | Fold Chag      | t    | p-value   | FDR        |           |
| 213844_at    | HOXA5       | 25.20    | 9.58 | 8.52E-16 | 4.64E-11 | 18.12          | 7.68 | 2.17E-11  | 1.30E-10   | Yes       |
| 209763_at    | CHRDL1      | 7.06     | 9.13 | 8.54E-15 | 2.33E-10 | 5.23           | 5.48 | 4.07E-07  | 7.32E-07   | Yes       |
| 235521_at    | HOXA3       | 8.55     | 8.71 | 6.86E-14 | 1.25E-09 |                |      |           |            |           |
| 1559477_s_at | MEIS1       | 8.04     | 7.22 | 1.08E-10 | 1.22E-06 |                |      |           |            |           |
| 235753_at    | HOXA7       | 2.98     | 7.21 | 1.12E-10 | 1.22E-06 |                |      |           |            |           |
| 214639_s_at  | HOXA1       | 1.93     | 7.15 | 1.47E-10 | 1.33E-06 | 1.44           | 2.40 | 0.0183621 | 0.02065736 | Yes       |
| 204069_at    | MEIS1       | 9.85     | 7.11 | 1.79E-10 | 1.39E-06 | 4.23           | 7.11 | 3.07E-10  | 1.10E-09   | Yes       |

|              |                |       |       |          |          |       |       |            |            |     |
|--------------|----------------|-------|-------|----------|----------|-------|-------|------------|------------|-----|
| 206289_at    | HOXA4          | 1.97  | 6.90  | 5.01E-10 | 3.41E-06 | 1.91  | 7.55  | 4.01E-11   | 1.80E-10   | Yes |
| 1559266_s_at | SKIDA1         | 3.38  | 6.78  | 8.71E-10 | 5.27E-06 |       |       |            |            |     |
| 209905_at    | HOXA10-HOXA9   | 25.73 | 6.47  | 3.65E-09 | 1.99E-05 | 20.60 | 7.79  | 1.35E-11   | 1.22E-10   | Yes |
| 214651_s_at  | HOXA10-HOXA9   | 33.07 | 6.43  | 4.53E-09 | 2.25E-05 | 37.81 | 6.51  | 4.62E-09   | 1.21E-08   | Yes |
| 242172_at    | ---            | 4.93  | 6.38  | 5.78E-09 | 2.62E-05 |       |       |            |            |     |
| 206847_s_at  | HOXA7          | 2.93  | 6.16  | 1.54E-08 | 6.45E-05 | 1.87  | 7.82  | 1.14E-11   | 1.22E-10   | Yes |
| 243003_at    | ---            | 3.53  | 6.04  | 2.63E-08 | 0.000102 |       |       |            |            |     |
| 210033_s_at  | SPAG6          | 4.04  | 5.97  | 3.67E-08 | 0.000131 | 4.30  | 5.60  | 2.44E-07   | 4.88E-07   | Yes |
| 227949_at    | PHACTR3        | 2.39  | 5.96  | 3.92E-08 | 0.000131 |       |       |            |            |     |
| 205600_x_at  | HOXB5          | 1.46  | 5.95  | 4.10E-08 | 0.000131 | 1.09  | 1.07  | 0.28599267 | 0.30281577 | No  |
| 210032_s_at  | SPAG6          | 2.13  | 5.89  | 5.35E-08 | 0.000162 | 1.68  | 4.39  | 3.22E-05   | 4.82E-05   | Yes |
| 228116_at    | ---            | 4.12  | 5.81  | 7.40E-08 | 0.000212 |       |       |            |            |     |
| 1553808_a_at | NKX2-3         | 1.81  | 5.63  | 1.70E-07 | 0.000463 |       |       |            |            |     |
| 242881_x_at  | LOC100506303 / | 7.94  | 5.59  | 1.98E-07 | 0.000513 |       |       |            |            |     |
| 237600_at    | ---            | 2.84  | 5.56  | 2.29E-07 | 0.000567 |       |       |            |            |     |
| 242216_at    | ---            | 7.79  | 5.39  | 4.84E-07 | 0.001146 |       |       |            |            |     |
| 235149_at    | PGM2L1         | 1.48  | 5.31  | 6.78E-07 | 0.00154  |       |       |            |            |     |
| 232587_at    | EML4           | 2.31  | 5.21  | 1.02E-06 | 0.002213 |       |       |            |            |     |
| 227195_at    | ZNF503         | 4.35  | 5.13  | 1.44E-06 | 0.003021 |       |       |            |            |     |
| 231374_at    | ---            | 1.99  | 5.10  | 1.66E-06 | 0.003352 |       |       |            |            |     |
| 202265_at    | BMI1 /// COMM  | 4.14  | 4.89  | 3.95E-06 | 0.00751  | 4.42  | 5.89  | 7.02E-08   | 1.58E-07   | Yes |
| 208557_at    | HOXA6          | 1.86  | 4.88  | 4.00E-06 | 0.00751  | 1.33  | 3.32  | 0.00133467 | 0.00160161 | Yes |
| 213150_at    | HOXA10         | 6.47  | 4.87  | 4.17E-06 | 0.007582 | 7.62  | 5.08  | 2.10E-06   | 3.44E-06   | Yes |
| 1555923_a_at | C10orf114      | 1.58  | 4.73  | 7.35E-06 | 0.012915 |       |       |            |            |     |
| 205408_at    | MLLT10         | 1.85  | 4.71  | 8.18E-06 | 0.013927 | 1.21  | 1.03  | 0.30410623 | 0.30410623 | No  |
| 219988_s_at  | RNF220         | 1.77  | 4.66  | 1.00E-05 | 0.016558 | 1.80  | 6.51  | 4.71E-09   | 1.21E-08   | Yes |
| 229667_s_at  | HOXB8          | 1.51  | 4.54  | 1.61E-05 | 0.025785 |       |       |            |            |     |
| 1559265_at   | SKIDA1         | 1.40  | 4.52  | 1.70E-05 | 0.026507 |       |       |            |            |     |
| 225992_at    | MLLT10         | 2.55  | 4.48  | 1.96E-05 | 0.029703 |       |       |            |            |     |
| 213147_at    | HOXA10         | 2.31  | 4.47  | 2.04E-05 | 0.030068 | 2.84  | 3.60  | 0.00052405 | 0.00067378 | Yes |
| 228708_at    | RAB27B         | 4.21  | 4.45  | 2.24E-05 | 0.032192 |       |       |            |            |     |
| 1569448_at   | PGM2L1         | 2.00  | 4.36  | 3.22E-05 | 0.045032 |       |       |            |            |     |
| 212265_at    | QKI            | -3.07 | -4.34 | 3.41E-05 | 0.046454 | -6.08 | -4.07 | 0.00010424 | 0.00014434 | Yes |

**MLLT10-R vs KMT2A-R**

| Probe Set ID | Gene Symbol    | COG Data |       |          |          | Soulier's Data |        |            |            | Validated |
|--------------|----------------|----------|-------|----------|----------|----------------|--------|------------|------------|-----------|
|              |                | old Chag | t     | p-value  | FDR      | old Chag       | t      | p-value    | FDR        |           |
| 203216_s_at  | MYO6           | -11.70   | -8.01 | 2.21E-12 | 1.20E-07 | -19.97         | -31.65 | 1.47E-08   | 2.80E-07   | Yes       |
| 236859_at    | RUNX2          | -4.85    | -7.72 | 9.21E-12 | 2.51E-07 |                |        |            |            |           |
| 236858_s_at  | RUNX2          | -3.42    | -7.59 | 1.73E-11 | 3.15E-07 |                |        |            |            |           |
| 203215_s_at  | MYO6           | -4.93    | -7.14 | 1.52E-10 | 2.08E-06 | -2.00          | -4.60  | 0.00276683 | 0.00438081 | Yes       |
| 226939_at    | CPEB2          | -10.63   | -5.97 | 3.64E-08 | 0.000397 |                |        |            |            |           |
| 240927_at    | ---            | -3.24    | -5.92 | 4.67E-08 | 0.000424 |                |        |            |            |           |
| 240468_at    | ---            | -4.26    | -5.80 | 7.89E-08 | 0.000615 |                |        |            |            |           |
| 210480_s_at  | MYO6           | -1.90    | -5.31 | 6.74E-07 | 0.004406 | -4.36          | -10.44 | 2.15E-05   | 6.82E-05   | Yes       |
| 213908_at    | WHAMMP2 /// V  | -4.69    | -5.29 | 7.27E-07 | 0.004406 | -3.39          | -6.62  | 0.00035703 | 0.00084794 | Yes       |
| 209763_at    | CHRDL1         | 4.00     | 5.26  | 8.22E-07 | 0.004482 | 3.66           | 5.42   | 0.00113568 | 0.00196162 | Yes       |
| 228837_at    | TCF4           | -1.59    | -5.17 | 1.23E-06 | 0.006089 |                |        |            |            |           |
| 1557261_at   | WHAMMP2 /// V  | -2.41    | -5.12 | 1.50E-06 | 0.006832 |                |        |            |            |           |
| 244105_at    | WHAMMP2 /// V  | -1.50    | -5.00 | 2.45E-06 | 0.010287 |                |        |            |            |           |
| 214705_at    | INADL          | -2.52    | -4.88 | 4.13E-06 | 0.015277 | -1.00          | -0.03  | 0.97913211 | 0.97913211 | No        |
| 1553145_at   | TAPT1-AS1      | -2.10    | -4.87 | 4.20E-06 | 0.015277 |                |        |            |            |           |
| 243617_at    | ZNF827         | -3.31    | -4.83 | 4.99E-06 | 0.016887 |                |        |            |            |           |
| 212382_at    | TCF4           | -5.11    | -4.82 | 5.27E-06 | 0.016887 | -7.71          | -16.43 | 1.14E-06   | 1.08E-05   | Yes       |
| 232587_at    | EML4           | 2.58     | 4.80  | 5.61E-06 | 0.016992 |                |        |            |            |           |
| 226297_at    | HIPK3          | -3.13    | -4.73 | 7.57E-06 | 0.020503 |                |        |            |            |           |
| 213891_s_at  | TCF4           | -7.54    | -4.72 | 7.77E-06 | 0.020503 | -18.61         | -15.23 | 1.88E-06   | 1.19E-05   | Yes       |
| 214772_at    | KIAA1549L      | -1.76    | -4.71 | 7.90E-06 | 0.020503 | -1.96          | -4.48  | 0.00317628 | 0.00464226 | Yes       |
| 228116_at    | ---            | 4.08     | 4.69  | 8.68E-06 | 0.021503 |                |        |            |            |           |
| 222146_s_at  | TCF4           | -4.44    | -4.65 | 1.01E-05 | 0.023948 | -11.95         | -10.45 | 2.14E-05   | 6.82E-05   | Yes       |
| 212387_at    | TCF4           | -5.04    | -4.64 | 1.06E-05 | 0.023959 | -11.50         | -9.31  | 4.44E-05   | 0.00012049 | Yes       |
| 243618_s_at  | ZNF827         | -3.74    | -4.61 | 1.21E-05 | 0.026329 |                |        |            |            |           |
| 235479_at    | CPEB2          | -2.32    | -4.59 | 1.29E-05 | 0.026975 |                |        |            |            |           |
| 242881_x_at  | LOC100506303 / | 8.08     | 4.58  | 1.34E-05 | 0.027027 |                |        |            |            |           |

|              |         |        |       |          |          |        |        |            |            |     |
|--------------|---------|--------|-------|----------|----------|--------|--------|------------|------------|-----|
| 206506_s_at  | SUPT3H  | -2.59  | -4.55 | 1.53E-05 | 0.029778 | -4.27  | -5.61  | 0.00093275 | 0.00177222 | Yes |
| 203753_at    | TCF4    | -5.44  | -4.51 | 1.78E-05 | 0.033501 | -5.85  | -6.47  | 0.00040892 | 0.00086327 | Yes |
| 212386_at    | TCF4    | -4.56  | -4.50 | 1.87E-05 | 0.033983 | -24.56 | -13.44 | 4.24E-06   | 2.01E-05   | Yes |
| 1553808_a_at | NKX2-3  | 1.79   | 4.47  | 2.09E-05 | 0.036713 |        |        |            |            |     |
| 215163_at    | ---     | -3.64  | -4.44 | 2.30E-05 | 0.038004 | -1.17  | -0.76  | 0.47213886 | 0.52768461 | No  |
| 210993_s_at  | SMAD1   | -5.57  | -4.44 | 2.30E-05 | 0.038004 | -4.49  | -1.44  | 0.19560037 | 0.23227544 | No  |
| 1556739_at   | GOLGA8I | -1.66  | -4.41 | 2.58E-05 | 0.041438 |        |        |            |            |     |
| 209871_s_at  | APBA2   | -2.72  | -4.40 | 2.74E-05 | 0.041559 | 1.10   | 0.20   | 0.84444383 | 0.89135738 | No  |
| 204304_s_at  | PROM1   | -20.73 | -4.40 | 2.74E-05 | 0.041559 | -37.53 | -3.90  | 0.00637213 | 0.00864789 | Yes |
| 231374_at    | ---     | 2.07   | 4.38  | 2.94E-05 | 0.043381 |        |        |            |            |     |
| 202263_at    | CYB5R1  | -1.77  | -4.36 | 3.17E-05 | 0.045502 | -1.40  | -1.97  | 0.09144352 | 0.11582846 | No  |
